# Supplementary material
Source: PubMed Central journal article supplement (PMC4005334)

**Zhuo et al., ATVB**

**Cytochrome P450 2C8  $\omega$ 3LCPUFA Metabolites Increase Mouse  
Retinal Pathologic Neovascularization**

**Supplemental Material**

**Supplemental Figure I:** No difference in retinal vascular area coverage at P7 was seen in both *Tie2-CYP2C8-Tg* and *Tie2-sEH-Tg* compared with their wild-type (WT) littermate controls. Increased retinal vascular area at P7 was observed in *sEH*<sup>-/-</sup> mice compared with WT controls. Unpaired t test, n.s. not significant, \*\*\*p<0.001.

### Supplemental Figure I

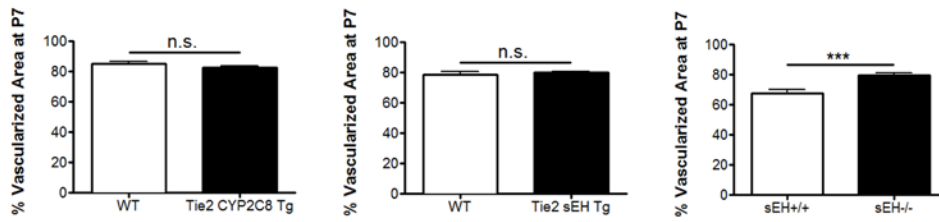

**Supplemental Figure II:** (A) No change in retinal vaso-obliteration was observed between WT and *Tie2-CYP2C8-Tg* mice with  $\omega$ 3LCPUFA feed. (B) No significant change was shown in plasma 14,15-EET, 11,12-EET, 5,6-EET and 8,9-EET between WT and *Tie2-CYP2C8-Tg* mice with  $\omega$ 3LCPUFA feed. (C) The retinal 14,15EET:DHET ratio in *Tie2-CYP2C8-Tg* was comparable with that in WT mice.

## Supplemental Figure II

**A**

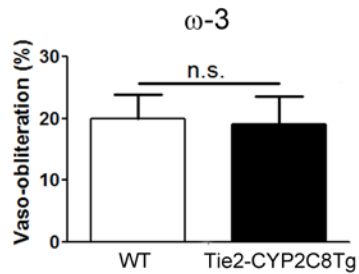

**B**

### Plasma of OIR mice on $\omega$ 3 feed

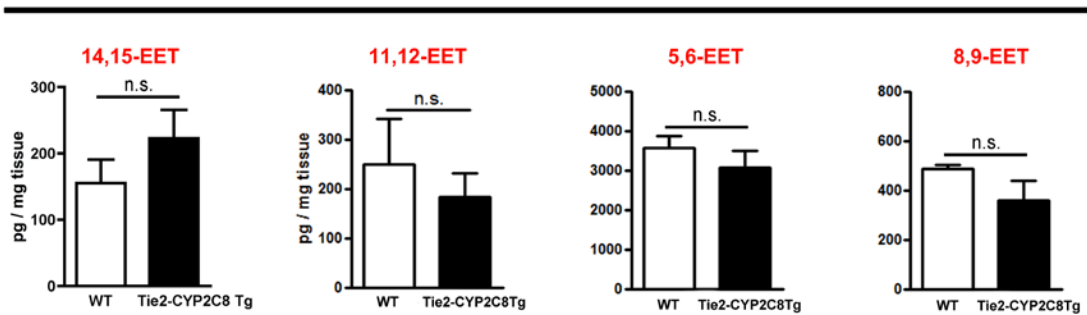

**C**

### Retina of OIR mice on $\omega$ 3 feed

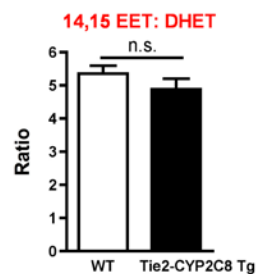

**Supplemental Figure III:** No global suppression of plasma COX metabolites 6-keto-PGF1 $\alpha$ , PGF2 $\alpha$ , 8-iso-PGF2 $\alpha$ , PGD2, PGE2 levels and LOX metabolites 15-HETE and 5-HETE levels in WT and Tie-2 CYP2C8Tg mice with  $\omega$ 3 or  $\omega$ 6 LCPUFA feeds.

### Supplemental Figure III

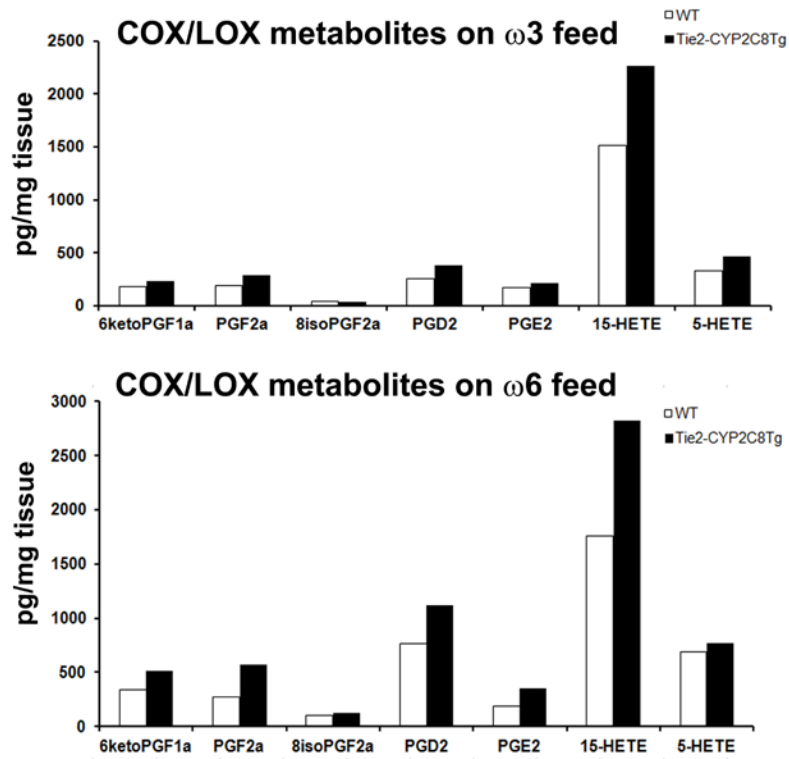

**Supplemental Figure IV:** With  $\omega$ 6LCPUFA feed, *Tie2-CYP2C8-Tg* induces OIR-neovascularization versus WT; no difference was seen with *Tie2-sEH-Tg* or *sEH<sup>-/-</sup>*. (A-C) Percentage of neovascularization of *Tie2-CYP2C8-Tg* (A), *Tie2-sEH-Tg* (B), *sEH<sup>-/-</sup>* (C) mice versus WT littermate controls (n=8-35/group) Scale bar: 500 $\mu$ m. Unpaired t test, n.s. not significant, \*p<0.05.

## Supplemental Figure IV

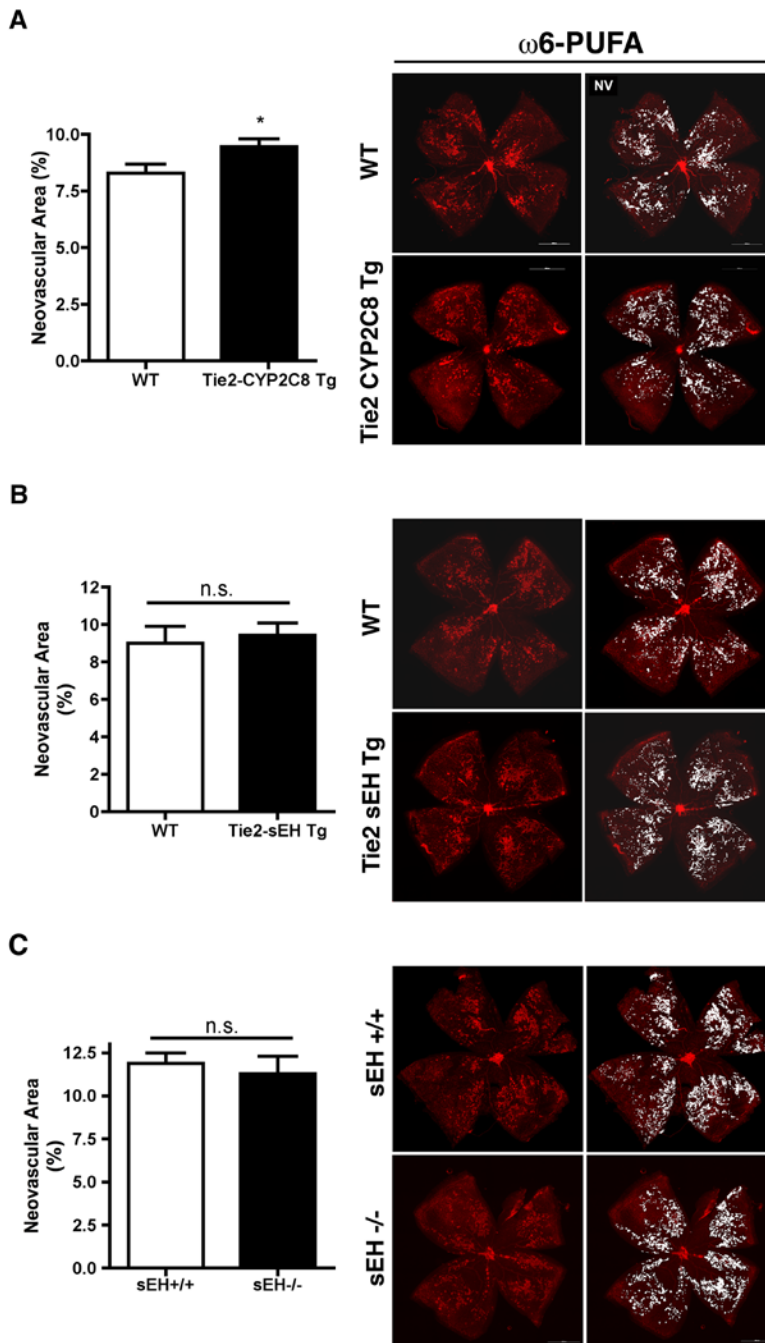

**Supplemental Figure V:** In OIR versus normoxia at P14 (on normal chow), the retinal 14,15-EET:14,15-DHET is increased. Plasma 14,15-EET and retinal 14,15-EET:14,15-DHET ratio are increased with *Tie2-CYP2C8-Tg* versus WT. With 14,15-EET treatment, aortic ring sprouting was similar in *Tie2-sEH-Tg*, *sEH<sup>-/-</sup>* and WT mice. (A) The ratio of corresponding 14,15EET epoxides to diols by LC/MS/MS oxylipid analysis. n=5/group. Two-way ANOVA with Bonferroni post-test, \*p<0.05, \*\*p<0.01. (B) With  $\omega$ 6PUFA feed, plasma 14,15EET levels in *Tie2-CYP2C8-Tg* and *Tie2-sEH-Tg* mice versus WT littermates. (C) The retinal 14,15EET:DHET ratio in *Tie2-CYP2C8-Tg* and *Tie2-sEH-Tg* mice versus WT controls (n=4-6/group). (D) Vascular sprouting from *Tie2-sEH-Tg* and *sEH<sup>-/-</sup>* aortas treated with 14,15EET (n=4-8/group). Unpaired t test, \*p<0.05, n.s.: not significant.

## Supplemental Figure V

**A**

### Retinal Epoxide Metabolite Ratio

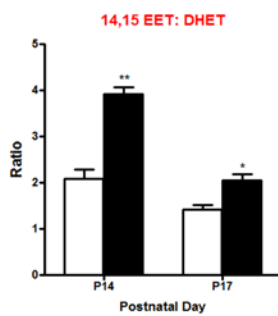

**B**

### Plasma of OIR mice on $\omega$ 6 feed

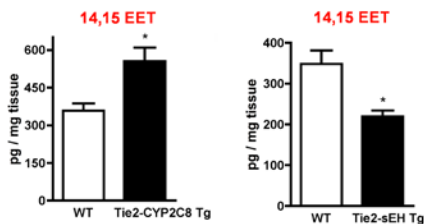

**C**

### Retina of OIR mice on $\omega$ 6 feed

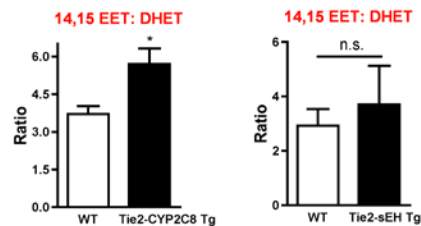

**D**

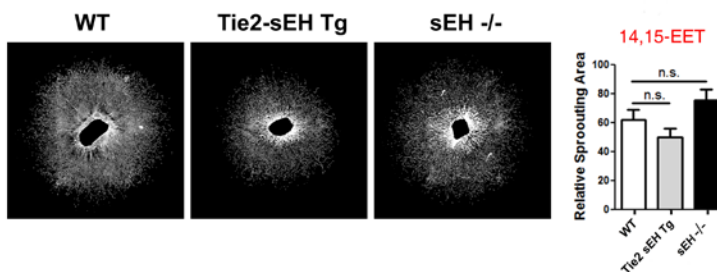

Supplement: NIHMS574329-supplement-supplement_1.pdf [file NIHMS574329-supplement-supplement_1.pdf]
